# Supplementary material for: The Impact of Land Abandonment on Species Richness and Abundance in the Mediterranean Basin: A Meta-Analysis
Source: PLOS journal article supplement (doi:10.1371/journal.pone.0098355), 2014-05-27

**Figure S1. Flow diagram reporting the number of records identified, excluded and added during the screening process.**

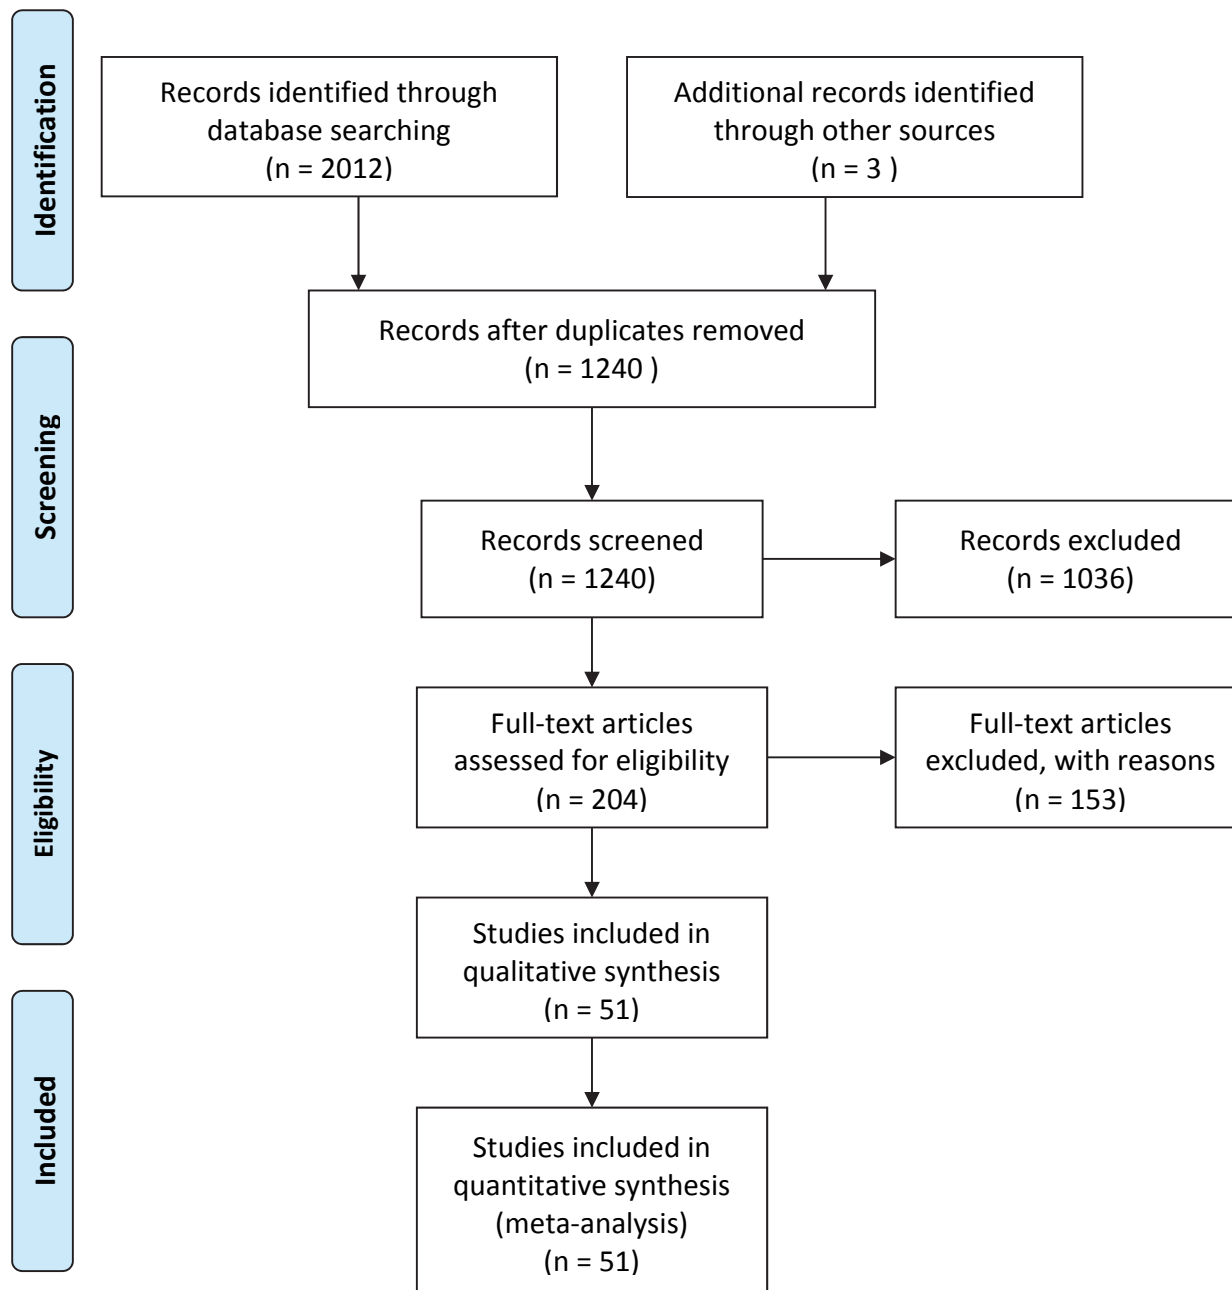

Supplement: S1 (10.1371/journal.pone.0098355.s001) [file journal.pone.0098355.s001]
